# Supplementary material
Source: publisher figshare collection journal article supplement (https://karger.figshare.com/ndownloader/files/30716792)
Supplement: Supplementary file 1 [file 30716792]

<https://drive.google.com/file/d/13Q49eJBUVrH2C596QCakGgSyyDGIAH31/view?usp=sharing>

**VIDEO.** Clinical presentation and surgical description of thoracic laminoplasty for tumor resection
